# Supplementary material for: Mapping vaccination coverage to explore the effects of delivery mechanisms and inform vaccination strategies
Source: PubMed Central journal article supplement (PMC6456602; doi:10.1038/s41467-019-09611-1), 2019-04-09
Supplement: 41467_2019_9611_MOESM1_ESM.pdf [file 41467_2019_9611_MOESM1_ESM.pdf]

## **Mapping vaccination coverage to explore the effects of delivery mechanisms and inform vaccination strategies**

Utazi CE, Thorley J, Alegana V, Ferrari M, Takahashi S, Metcalf C, Lessler J, Cutts FT and Tatem AJ

### **Supplementary Information**

This document accompanies the main paper. It contains the supplementary methods and supplementary tables and figures referenced in the paper.

## Supplementary Methods

Here, we provide further details of the models used in mapping MCV and DTP coverage. The coregionalization approach for the cross-covariance function  $\mathbf{C}_w$  in the multivariate model for DTP is based on the linear transformation  $\mathbf{w}(\mathbf{s}) = \mathbf{A}(\mathbf{s})\tilde{\mathbf{w}}(\mathbf{s})$ , where  $\mathbf{A}(\mathbf{s})$  is a non-singular (possibly) space-varying matrix transform,  $\tilde{\mathbf{w}}(\mathbf{s}) = (\tilde{w}_1(\mathbf{s}), \tilde{w}_2(\mathbf{s}), \tilde{w}_3(\mathbf{s}))$  and  $\tilde{w}_j(\mathbf{s})$  is an independent spatial process with unit variance, i.e.  $\text{var}(\tilde{w}_j(\mathbf{s})) = 1$ , and correlation function  $\rho_j(\mathbf{s}, \mathbf{s}')$ . Thus, the cross-covariance matrix for  $\tilde{\mathbf{w}}(\mathbf{s})$ ,  $\mathbf{C}_{\tilde{w}}(\mathbf{s}, \mathbf{s}')$ , is diagonal with  $j$ th diagonal element given by  $\rho_j(\mathbf{s}, \mathbf{s}')$ , yielding a valid nonstationary cross-covariance  $\mathbf{C}_w(\mathbf{s}, \mathbf{s}') = \mathbf{A}(\mathbf{s})\mathbf{C}_{\tilde{w}}(\mathbf{s}, \mathbf{s}')\mathbf{A}(\mathbf{s}')'$  for  $\mathbf{w}(\mathbf{s})$  (see <sup>1</sup>). As in the model for measles, we modelled  $\rho_j(\mathbf{s}, \mathbf{s}')$  using the exponential correlation function given by  $\rho_j(\mathbf{s}, \mathbf{s}') = \exp(-\phi_j \|\mathbf{s} - \mathbf{s}'\|)$ , where  $\phi_j$  is a spatial decay parameter and  $\|\cdot\|$  denotes the Euclidean distance. Under the assumption of stationarity, the linear transformation is independent of space, so that  $\mathbf{A}(\mathbf{s}) = \mathbf{A}$  and  $\mathbf{C}_w(\mathbf{s}, \mathbf{s}') = \mathbf{A}\mathbf{C}_{\tilde{w}}(\mathbf{s}, \mathbf{s}')\mathbf{A}'$ ; which also implies that  $\mathbf{C}_w(\mathbf{s}, \mathbf{s}) = \mathbf{C}_w(\mathbf{0}) = \mathbf{A}\mathbf{A}'$  (since  $\mathbf{C}_{\tilde{w}}(\mathbf{s}, \mathbf{s}) = \mathbf{I}_3$ ). We assign an inverse-Wishart prior  $(3, \mathbf{I}_3)$  to the cross-covariance matrix,  $\mathbf{A}\mathbf{A}'$ ; see <sup>2</sup>. To complete the Bayesian specification, we place the weakly informative prior: Normal  $(\mathbf{0}, 10^3\mathbf{I})$  on  $\boldsymbol{\beta}_j$ . For  $\phi_j$ , we use country-specific Uniform  $(a_\phi, b_\phi)$  prior distributions. For DRC and Ethiopia, we set  $a_\phi = 0.166$  and  $b_\phi = 1.11$ , corresponding to an effective range of between 300 and 2000 km. For Mozambique, Nigeria and Cambodia, we set  $a_\phi = 0.475, 0.33, 0.66$  and  $b_\phi = 3.3, 1.11, 6.6$ , respectively. These yield effective ranges of between 100 and 700 km for Mozambique, 300 and 1000 km for Nigeria, and 50 and 504 km for Cambodia. (The effective range is the distance at which spatial correlation drops to 0.05, calculated here as  $-\log(0.05)/\phi_j$  in decimal degrees.) These uniform priors were chosen due to the need to include moderate levels of correlation in the models and in some cases, relative to the geographical extents of the countries. We note that for comparability, these uniform priors were also placed on the spatial decay parameters in the respective univariate models for MCV.

Additional information about the multivariate model can be found in <sup>1</sup> and <sup>2</sup>. To ease the computational burden associated with fitting these models, particularly the multivariate model, we use the predictive process model specification in spBayes for both MCV and DTP1-3. The predictive process model projects the spatial process -  $\mathbf{w} = (w(\mathbf{s}_1), \dots, w(\mathbf{s}_n))$  for MCV and  $\mathbf{W} = (\mathbf{w}^T(\mathbf{s}_1), \dots, \mathbf{w}^T(\mathbf{s}_n))$  for DTP1-3 - to a lower-dimensional process that is generated by the realizations of the original process at a specified set of locations known as knot locations. Following pilot runs, we chose 150 knot locations (from the DHS cluster or data locations) for Nigeria, 200 for DRC and 100 for Ethiopia, Cambodia and Mozambique. The knot locations were determined using a space-filling design algorithm <sup>3</sup>. As in <sup>4</sup>, the MCMC algorithms were run for 90,000 iterations after a burn-in of 10,000 iterations. Convergence was assessed by examining the trace plots of the parameters and through other convergence diagnostics such as the Geweke statistic <sup>5</sup>.

To evaluate the performance of the fitted models (both MCV and DTP1-3) for out-of-sample prediction, we adopted the Monte Carlo method of cross-validation repeated 10 times with 10% of the DHS cluster-level data set aside for validation each time. As in <sup>4</sup>, the following model evaluation metrics were computed (and averaged) using the observed  $(p_i)$  and

predicted ( $\hat{p}_i$ ) probabilities for the validation cluster locations: percentage bias ( $\%bias = 100 \times \sum_{i=1}^m (\hat{p}_i - p_i) / \sum_{i=1}^m p_i$ ), validation mean square error ( $VMSE = \sum_i (\hat{p}_i - p_i)^2 / m$ ). Also, the achieved coverage of the 95% prediction intervals was calculated as:  $(100 \times \sum_i I(l_i \leq y_i \leq u_i) / m)$ , where  $l_i$  and  $u_i$  denote the lower and upper limits of the prediction interval for the number of children vaccinated at the  $i$ th validation location,  $y_i$  the corresponding observed number of children vaccinated,  $I(\cdot)$  is an indicator function and  $m$  is the number of validation locations. The closer the values of  $\%bias$  and  $VMSE$  are to zero, the better the predictions. Similarly, the closer the achieved coverage is to its true value (i.e. 95%), the better the predictions. Finally, the  $R^2$  values of the fitted models during cross-validation were calculated as the square of the sample (or Pearson's) correlation coefficient between the observed and predicted probabilities. Note that the  $\%bias$  formula given here can also be written as  $\%bias = \frac{100}{m} \times \sum_{i=1}^m [(\hat{p}_i - p_i) / \bar{p}]$ . The division by  $\bar{p}$  instead of  $p_i$  was due to the fact that in the latter case,  $\%bias$  would be undefined when  $p_i = 0$  as was the case in some cluster locations.

Supplementary Table 1: Selected covariates for modeling MCV and DTP1-3

| Country    | MCV                                                                                   | DTP1-3                                                                                 |
|------------|---------------------------------------------------------------------------------------|----------------------------------------------------------------------------------------|
| Nigeria    | Poverty, Aridity, Nighttime lights, Travel time (to major cities), EVI                | Poverty, Aridity, Travel time, EVI                                                     |
| Ethiopia   | Dist. to urban areas, Population density, Travel time, Dist. to water, Dist. to rail  | Dist. to urban areas, Travel time, MODIS net primary production, Pig density           |
| DRC        | Dist. to urban areas, Cattle density, Temperature, Pig density, Aridity               | Dist. to urban areas, Temperature, Cattle density, Slope, MODIS net primary production |
| Cambodia   | Travel time, Population density, Dist. to residential areas, Dist. to infrastructures | Travel time, MODIS net primary production, Slope, Dist. to places                      |
| Mozambique | Travel time, Precipitation, Evapotranspiration, MODIS net primary production          | Precipitation, Dist. to highways, Slope, Evapotranspiration                            |

Supplementary Table 2: Description of selected covariates for modeling MCV and DTP1-3

| Covariate                            | Description                                                                                                                                                             | Unit                                                                                    | Source                                                                                                                                                                                                                 |
|--------------------------------------|-------------------------------------------------------------------------------------------------------------------------------------------------------------------------|-----------------------------------------------------------------------------------------|------------------------------------------------------------------------------------------------------------------------------------------------------------------------------------------------------------------------|
| Poverty                              | Proportion of people living in poverty, as defined by \$2.00 / day.                                                                                                     | -                                                                                       | Tatem, A. J., D. Weiss, and C. Pezzulo. "Pilot high resolution poverty maps." <i>Southampton: Oxford Uo</i> (2013)                                                                                                     |
| Aridity                              | Aridity Index (AI) = MAP / MAE where: MAP = Mean Annual Precipitation and MAE = Mean Annual Potential EvapoTranspiration. Annual average for the 1950- 2000 period.     | Index values increase for more humid conditions, and decrease with more arid conditions | CGIAR-CSI Global-Aridity and Global-PET Database <a href="http://www.cgiar-csi.org">www.cgiar-csi.org</a>                                                                                                              |
| Global Potential Evapo-Transpiration | Potential Evapo-Transpiration (PET) is a measure of the ability of the atmosphere to remove water through evapotranspiration. Annual average for the 1950- 2000 period. | mm/month                                                                                | CGIAR-CSI Global-Aridity and Global-PET Database <a href="http://www.cgiar-csi.org">www.cgiar-csi.org</a>                                                                                                              |
| MODIS net primary production         | A measure of the growth of the terrestrial vegetation. Annual NPP is derived from the sum of the 45, 8-day Net Photosynthesis (PSN) products from the given year.       | g C m <sup>2</sup>                                                                      | Running, S., Mu, Q., Zhao, M. (2015). MOD17A3H MODIS/Terra Net Primary Production Yearly L4 Global 500m SIN Grid V006. NASA EOSDIS Land Processes DAAC.                                                                |
| Enhanced Vegetation Index (EVI)      | A measure of vegetation canopy greenness, a combined property of leaf area, chlorophyll and canopy structure.                                                           | Index values increase with canopy greenness                                             | Didan, K. (2015). <i>MOD13A3 MODIS/Terra vegetation Indices Monthly L3 Global 1km SIN Grid V006</i> . NASA EOSDIS LP DAAC.                                                                                             |
| Temperature                          | Average for the 1970-2000 period.                                                                                                                                       | °C                                                                                      | Fick, S.E. and Hijmans, R.J. (2017) WorldClim 2: New spatial resolution climate surfaces for global land areas. <i>International journal of Climatology</i> . <a href="http://www.worldclim.org">www.worldclim.org</a> |
| Precipitation                        | Average for the 1970-2000 period.                                                                                                                                       | mm                                                                                      | As above.                                                                                                                                                                                                              |
| Slope                                | Slope in degrees, derived from elevation data.                                                                                                                          | °                                                                                       | US Geological Survey (USGS) <a href="http://eros.usgs.gov/elevation-products">http://eros.usgs.gov/elevation-products</a>                                                                                              |
| Cattle density                       | Livestock densities – global distribution of cattle.                                                                                                                    | heads per sq. km                                                                        | Gridded Livestock of the World v2.0, Robinson T.P., Wint, G.R.W., Conchedda, G., Van Boeckel, T.P., Ercoli,                                                                                                            |

|                                                                               |                                                                                                                              |                                   |                                                                                                                                                                                                                                                                                                                                    |
|-------------------------------------------------------------------------------|------------------------------------------------------------------------------------------------------------------------------|-----------------------------------|------------------------------------------------------------------------------------------------------------------------------------------------------------------------------------------------------------------------------------------------------------------------------------------------------------------------------------|
|                                                                               |                                                                                                                              |                                   | V., Palamara, E., Cinardi, G., D'Aietti, L., Hay, S.I and Gilbert, M. (2014) Mapping the global distribution of livestock. PLoS ONE 9(5):e96084. doi:10.1371/journal.pone.0096084.                                                                                                                                                 |
| Pig density                                                                   | Livestock densities – global distribution of pigs.                                                                           | heads per sq. km                  | As above.                                                                                                                                                                                                                                                                                                                          |
| Travel time                                                                   | Travel time to major cities of >50,000 people in the year 2000.                                                              | Minutes                           | <b>Nelson, A. (2008)</b> Estimated travel time to the nearest city of 50,000 or more people in year 2000. Global Environment Monitoring Unit - Joint Research Centre of the European Commission, Ispra Italy. Available at <a href="http://forobs.jrc.ec.europa.eu/products/gam/">http://forobs.jrc.ec.europa.eu/products/gam/</a> |
| Night-time lights                                                             | Land-based night-time lights.                                                                                                | Nano-Watts/(sqcm*sr)              | NOAA VIIRS <a href="http://ngdc.noaa.gov/eog">ngdc.noaa.gov/eog</a>                                                                                                                                                                                                                                                                |
| Distance to urban areas                                                       | Derived from global maps of urban extent based on Moderate Resolution Imaging Spectroradiometer (MODIS) 500m satellite data. | Distance (m)                      | Schneider, A., Friedl, M., Potere, D., 2009, A new map of global urban extent from MODIS data. Environmental Research Letters, vol. 4, article 044003.                                                                                                                                                                             |
| Distance to water, rail, residential areas, infrastructures, places, highways | Derived from OSM input data.                                                                                                 | Distance (m)                      | Input data from Open Street map (2016) <a href="http://www.openstreetmap.org">www.openstreetmap.org</a>                                                                                                                                                                                                                            |
| Population density                                                            | Estimates of numbers of people per grid square, with national totals adjusted to match UN population division estimates.     | Estimated persons per grid square | WorldPop Project <a href="http://www.worldpop.org">www.worldpop.org</a>                                                                                                                                                                                                                                                            |

Supplementary Table 3. Estimates of the parameters of the fitted models for Nigeria. Reported are the posterior means, standard deviations (SD) and quantiles (2.5%, 50% and 97.5%) of the regression coefficients and the parameters of the spatial random effects.

| Parameter                                      | Mean                 | SD                    | 2.5%                   | 50%                    | 97.5%                 |
|------------------------------------------------|----------------------|-----------------------|------------------------|------------------------|-----------------------|
| MCV (9-59 months)                              |                      |                       |                        |                        |                       |
| (Intercept)                                    | 1.6556               | 0.2706                | 1.1776                 | 1.6502                 | 2.1967                |
| Poverty                                        | -2.8564              | 0.2717                | -3.4510                | -2.8400                | -2.1844               |
| Aridity                                        | $4.7 \times 10^{-6}$ | $2.03 \times 10^{-5}$ | $-4.23 \times 10^{-5}$ | $-4.42 \times 10^{-6}$ | $3.28 \times 10^{-5}$ |
| log(Nighttime lights)                          | 0.4214               | 0.0512                | 0.3219                 | 0.4223                 | 0.5212                |
| log(Travel time)                               | -0.1419              | 0.0326                | -0.2061                | -0.1376                | -0.0799               |
| EVI                                            | 2.8967               | 0.6237                | 1.7217                 | 2.8621                 | 4.2550                |
| Partial sill ( $\sigma^2$ )                    | 2.1090               | 0.3829                | 1.5018                 | 2.0549                 | 2.9940                |
| Spatial decay ( $\phi$ )*                      | 0.9174               | 0.1320                | 0.6161                 | 0.9406                 | 1.1005                |
| DTP1 (0-59 months)                             |                      |                       |                        |                        |                       |
| (Intercept)                                    | 1.2947               | 0.2790                | 0.7771                 | 1.2775                 | 1.8385                |
| Poverty                                        | -1.1834              | 0.3457                | -1.7859                | -1.1586                | -0.5897               |
| Aridity                                        | 0.0001               | $1.15 \times 10^{-5}$ | $3.45 \times 10^{-5}$  | 0.0001                 | 0.0001                |
| log(Travel time)                               | -0.2082              | 0.0216                | -0.2493                | -0.2065                | -0.1670               |
| EVI                                            | 0.7272               | 0.4168                | 0.0543                 | 0.6861                 | 1.6018                |
| Spatial decay ( $\phi_1$ )*                    | 0.8650               | 0.1757                | 0.4525                 | 0.8995                 | 1.0997                |
| DTP2 (0-59 months)                             |                      |                       |                        |                        |                       |
| (Intercept)                                    | 0.3135               | 0.3410                | -0.2429                | 0.3807                 | 0.8653                |
| Poverty                                        | -0.3941              | 0.2978                | -0.9670                | -0.3919                | 0.1488                |
| Aridity                                        | 0.0001               | $1.10 \times 10^{-5}$ | $4.45 \times 10^{-5}$  | 0.0001                 | 0.0001                |
| log(Travel time)                               | -0.2266              | 0.0215                | -0.2654                | -0.2269                | -0.1837               |
| EVI                                            | 0.5815               | 0.5051                | -0.3773                | 0.5807                 | 1.5039                |
| Spatial decay ( $\phi_2$ )*                    | 0.4370               | 0.1357                | 0.3324                 | 0.3884                 | 0.8839                |
| DTP3 (0-59 months)                             |                      |                       |                        |                        |                       |
| (Intercept)                                    | -0.0392              | 0.3622                | -0.6451                | 0.0250                 | 0.5915                |
| Poverty                                        | -0.4324              | 0.2831                | -0.8896                | -0.4693                | 0.3092                |
| Aridity                                        | 0.0001               | $1.02 \times 10^{-5}$ | $3.45 \times 10^{-5}$  | 0.0001                 | 0.0001                |
| log(Travel time)                               | -0.2313              | 0.0217                | -0.2724                | -0.2328                | -0.1853               |
| EVI                                            | 0.6473               | 0.4003                | -0.0997                | 0.6325                 | 1.4254                |
| Spatial decay ( $\phi_3$ )*                    | 0.5648               | 0.2156                | 0.3344                 | 0.4860                 | 1.0637                |
| Cross covariance parameters $C_w$ for DTP1-3** |                      |                       |                        |                        |                       |
| $C_w(DTP1)$                                    | 3.7410               | 0.9755                | 2.5107                 | 3.4862                 | 6.4356                |
| $C_w(DTP1,DTP2)$                               | 3.5767               | 0.9588                | 2.3376                 | 3.3349                 | 6.3213                |
| $C_w(DTP1,DTP3)$                               | 3.5011               | 0.8954                | 2.3668                 | 3.2804                 | 5.9156                |
| $C_w(DTP2)$                                    | 3.5211               | 0.9704                | 2.2585                 | 3.3048                 | 6.3656                |
| $C_w(DTP2,DTP3)$                               | 3.4197               | 0.8977                | 2.2357                 | 3.2237                 | 5.8537                |
| $C_w(DTP3)$                                    | 3.4391               | 0.8554                | 2.3490                 | 3.2494                 | 5.6989                |

\*These correspond to effective ranges of 363 km, 385 km, 761 km and 588 km, respectively.

\*\*The estimated values here correspond to correlations of 0.99, 0.98 and 0.98 between DTP1 and 2, DTP1 and 3 and DTP2 and 3, respectively.

Supplementary Table 4. Estimates of the parameters of the fitted models for Ethiopia. Reported are the posterior means, standard deviations (SD) and quantiles (2.5%, 50% and 97.5%) of the regression coefficients and the parameters of the spatial random effects.

| Parameter                                      | Mean    | SD     | 2.5%    | 50%     | 97.5%   |
|------------------------------------------------|---------|--------|---------|---------|---------|
| MCV (9-59 months)                              |         |        |         |         |         |
| (Intercept)                                    | 1.7920  | 0.7300 | -0.0642 | 1.7594  | 2.9073  |
| log(Dist. to urban areas)                      | -0.2034 | 0.0451 | -0.2856 | -0.2083 | -0.1082 |
| log(Population density)                        | 0.1212  | 0.0558 | 0.0084  | 0.1222  | 0.2326  |
| log(Travel time)                               | 0.0538  | 0.0701 | -0.1133 | 0.0465  | 0.1918  |
| log(Dist. to water)                            | -0.1194 | 0.0419 | -0.1983 | -0.1193 | -0.0423 |
| log(Dist. to rail)                             | 0.0397  | 0.0717 | -0.0817 | 0.0328  | 0.1575  |
| Partial sill ( $\sigma^2$ )                    | 1.5968  | 0.3743 | 0.9951  | 1.5598  | 2.4659  |
| Spatial decay ( $\phi$ )*                      | 0.9487  | 0.1351 | 0.6163  | 0.9845  | 1.1037  |
| DTP1 (0-59 months)                             |         |        |         |         |         |
| (Intercept)                                    | 5.9386  | 0.5635 | 4.7910  | 5.9074  | 7.1558  |
| log(Dist. to urban areas)                      | -0.3463 | 0.0434 | -0.4346 | -0.3424 | -0.2716 |
| log(Travel time)                               | -0.2021 | 0.0514 | -0.3078 | -0.1997 | -0.1032 |
| log(MODIS net primary production)              | 0.2962  | 0.1577 | -0.0110 | 0.2953  | 0.6021  |
| log(Pig density)                               | 1.2492  | 0.3601 | 0.6359  | 1.2251  | 2.0065  |
| Spatial decay ( $\phi_1$ )*                    | 0.3027  | 0.1161 | 0.1702  | 0.2675  | 0.5804  |
| DTP2 (0-59 months)                             |         |        |         |         |         |
| (Intercept)                                    | 5.4473  | 0.5300 | 3.9971  | 5.5488  | 6.1894  |
| log(Dist. to urban areas)                      | -0.3555 | 0.0430 | -0.4554 | -0.3560 | -0.2811 |
| log(Travel time)                               | -0.2157 | 0.0508 | -0.3172 | -0.2180 | -0.1072 |
| log(MODIS net primary production)              | 0.1242  | 0.1492 | -0.1655 | 0.1233  | 0.4169  |
| log(Pig density)                               | 1.1277  | 0.3170 | 0.4977  | 1.1318  | 1.7928  |
| Spatial decay ( $\phi_2$ )*                    | 0.3711  | 0.2443 | 0.1690  | 0.2594  | 1.0237  |
| DTP3 (0-59 months)                             |         |        |         |         |         |
| (Intercept)                                    | 4.8809  | 0.5682 | 3.9520  | 4.8427  | 6.0608  |
| log(Dist. to urban areas)                      | -0.3446 | 0.0476 | -0.4393 | -0.3428 | -0.2518 |
| log(Travel time)                               | -0.2268 | 0.0621 | -0.3418 | -0.2288 | -0.1174 |
| log(MODIS net primary production)              | 0.1251  | 0.1662 | -0.2045 | 0.1311  | 0.4322  |
| log(Pig density)                               | 1.0645  | 0.3018 | 0.4567  | 1.0792  | 1.6079  |
| Spatial decay ( $\phi_3$ )*                    | 0.4222  | 0.2718 | 0.1690  | 0.2969  | 1.0543  |
| Cross covariance parameters $C_w$ for DTP1-3** |         |        |         |         |         |
| $C_{w(DTP1)}$                                  | 17.9196 | 8.0087 | 6.6991  | 18.5309 | 32.3521 |
| $C_{w(DTP1,DTP2)}$                             | 17.7897 | 7.6717 | 7.3612  | 17.9730 | 31.4266 |
| $C_{w(DTP1,DTP3)}$                             | 17.4556 | 7.5249 | 7.0439  | 18.4160 | 31.6490 |



|                    |         |        |        |         |         |
|--------------------|---------|--------|--------|---------|---------|
| $C_{w(DTP2)}$      | 17.9630 | 7.6047 | 7.5227 | 17.0508 | 31.9146 |
| $C_{w(DTP2,DTP3)}$ | 17.5425 | 7.3745 | 7.2621 | 18.0415 | 31.5696 |
| $C_{w(DTP3)}$      | 17.3890 | 7.4223 | 7.0977 | 17.4387 | 31.8864 |

\*These correspond to effective ranges of 350 km, 1098 km, 896 km and 788 km, respectively.

\*\*The estimated values here correspond to correlations of 0.99, 0.99 and 0.99 between DTP1 and 2, DTP1 and 3 and DTP2 and 3, respectively.

Supplementary Table 5. Estimates of the parameters of the fitted models for DRC. Reported are the posterior means, standard deviations (SD) and quantiles (2.5%, 50% and 97.5%) of the regression coefficients and the parameters of the spatial random effects.

| Parameter                    | Mean    | SD     | 2.5%    | 50%     | 97.5%   |
|------------------------------|---------|--------|---------|---------|---------|
| MCV (9-59 months)            |         |        |         |         |         |
| (Intercept)                  | 5.3244  | 0.5899 | 4.1988  | 5.5107  | 6.1019  |
| log(Dist. to urban areas)    | -0.1725 | 0.0288 | -0.2274 | -0.1695 | -0.1280 |
| log(Cattle density)          | 0.3403  | 0.0787 | 0.1913  | 0.3381  | 0.4883  |
| Temperature                  | -0.0124 | 0.0022 | -0.0155 | -0.0125 | -0.0075 |
| log(Pig density)             | -0.0044 | 0.0866 | -0.1929 | -0.0020 | 0.1599  |
| Aridity                      | 0.1195  | 0.3854 | -0.8509 | 0.2040  | 0.6129  |
| Partial sill ( $\sigma^2$ )  | 2.2796  | 0.4218 | 1.6287  | 2.2142  | 3.2762  |
| Spatial decay ( $\phi$ )*    | 0.8480  | 0.1378 | 0.5531  | 0.8543  | 1.0850  |
| DTP1 (0-59 months)           |         |        |         |         |         |
| (Intercept)                  | 6.4043  | 0.5198 | 5.3612  | 6.4525  | 7.2008  |
| log(Dist. to urban areas)    | -0.1203 | 0.0255 | -0.1735 | -0.1186 | -0.0741 |
| Temperature                  | -0.0159 | 0.0023 | -0.0190 | -0.0162 | -0.0108 |
| log(Cattle density)          | 0.2582  | 0.0785 | 0.1077  | 0.2578  | 0.4078  |
| Slope                        | -0.0415 | 0.0136 | -0.0682 | -0.0417 | -0.0148 |
| MODIS net primary production | 0.1898  | 0.0671 | 0.0261  | 0.1917  | 0.3148  |
| Spatial decay ( $\phi_1$ )*  | 0.1756  | 0.0088 | 0.1663  | 0.1729  | 0.1989  |
| DTP2 (0-59 months)           |         |        |         |         |         |
| (Intercept)                  | 2.9825  | 0.7742 | 1.4362  | 3.2558  | 3.8154  |
| log(Dist. to urban areas)    | -0.0716 | 0.0203 | -0.1065 | -0.0736 | -0.0295 |
| Temperature                  | -0.0059 | 0.0030 | -0.0095 | -0.0069 | 0.0003  |
| log(Cattle density)          | 0.1637  | 0.0710 | 0.0269  | 0.1636  | 0.3059  |
| Slope                        | -0.0353 | 0.0125 | -0.0594 | -0.0356 | -0.0101 |
| MODIS net primary production | 0.1900  | 0.0568 | 0.0897  | 0.1867  | 0.3152  |
| Spatial decay ( $\phi_2$ )*  | 1.0868  | 0.0238 | 1.0218  | 1.0939  | 1.1094  |
| DTP3 (0-59 months)           |         |        |         |         |         |

|                                                |         |        |         |         |         |
|------------------------------------------------|---------|--------|---------|---------|---------|
| (Intercept)                                    | 2.9801  | 0.5840 | 2.0848  | 2.9592  | 4.2438  |
| log(Dist. to urban areas)                      | -0.0637 | 0.0178 | -0.0988 | -0.0634 | -0.0302 |
| Temperature                                    | -0.0103 | 0.0022 | -0.0145 | -0.0103 | -0.0060 |
| log(Cattle density)                            | 0.2498  | 0.0609 | 0.1294  | 0.2499  | 0.3652  |
| Slope                                          | -0.0458 | 0.0125 | -0.0708 | -0.0454 | -0.0227 |
| MODIS net primary production                   | 0.1471  | 0.0484 | 0.0543  | 0.1460  | 0.2444  |
| Spatial decay ( $\phi_3$ )*                    | 0.2125  | 0.0500 | 0.1670  | 0.1957  | 0.3606  |
| Cross covariance parameters $C_w$ for DTP1-3** |         |        |         |         |         |
| $C_w(DTP1)$                                    | 12.5472 | 1.5773 | 9.3784  | 12.5555 | 15.6846 |
| $C_w(DTP1,DTP2)$                               | 13.1156 | 1.4979 | 10.0308 | 13.0834 | 15.9053 |
| $C_w(DTP1,DTP3)$                               | 12.1559 | 1.4530 | 9.0416  | 12.1270 | 14.8239 |
| $C_w(DTP2)$                                    | 13.9595 | 1.6366 | 10.8467 | 13.9638 | 17.1766 |
| $C_w(DTP2,DTP3)$                               | 13.0465 | 1.5448 | 9.8739  | 13.0894 | 15.8690 |
| $C_w(DTP3)$                                    | 12.5141 | 1.6681 | 9.1015  | 12.5336 | 15.7276 |

\*These correspond to effective ranges of 392 km, 1894 km, 306 km and 1565 km, respectively.

\*\*The estimated values here correspond to correlations of 0.99, 0.97 and 0.99 between DTP1 and 2, DTP1 and 3 and DTP2 and 3, respectively.

Supplementary Table 6. Estimates of the parameters of the fitted models for Cambodia. Reported are the posterior means, standard deviations (SD) and quantiles (2.5%, 50% and 97.5%) of the regression coefficients and the parameters of the spatial random effects.

| Parameter                           | Mean     | SD       | 2.5%     | 50%      | 97.5%    |
|-------------------------------------|----------|----------|----------|----------|----------|
| MCV (9-59 months)                   |          |          |          |          |          |
| (Intercept)                         | 3.733786 | 0.654884 | 2.682752 | 3.684607 | 5.001571 |
| log (travel time)                   | -0.12775 | 0.080679 | -0.30483 | -0.11762 | 0.006736 |
| log (population density)            | 0.111343 | 0.046866 | 0.024422 | 0.110788 | 0.205731 |
| log (distance to residential areas) | -0.0331  | 0.0485   | -0.14257 | -0.02819 | 0.057496 |
| log (distance to infrastructures)   | -0.17493 | 0.057194 | -0.26908 | -0.18842 | -0.06486 |
| Partial sill ( $\sigma^2$ )         | 0.432501 | 0.169902 | 0.201971 | 0.399369 | 0.81543  |
| Spatial decay ( $\phi$ )*           | 3.180514 | 1.294416 | 0.916442 | 3.130863 | 5.882994 |
| DTP1 (0-59 months)                  |          |          |          |          |          |
| (Intercept)                         | 4.0316   | 0.5449   | 3.0542   | 4.0229   | 5.0568   |
| log(Travel time)                    | -0.1108  | 0.0713   | -0.2456  | -0.1115  | 0.0245   |
| MODIS net primary production        | 0.0000   | 0.0001   | -0.0001  | 0.0000   | 0.0001   |
| log(Slope)                          | 0.4429   | 0.1631   | 0.1233   | 0.4432   | 0.7631   |
| log(Distance to places)             | -0.1841  | 0.0664   | -0.3269  | -0.1733  | -0.0868  |

|                                                |         |        |         |         |         |
|------------------------------------------------|---------|--------|---------|---------|---------|
| Spatial decay ( $\phi_1$ )*                    | 1.2160  | 0.3703 | 0.7000  | 1.1727  | 2.0645  |
| DTP2 (0-59 months)                             |         |        |         |         |         |
| (Intercept)                                    | 3.8322  | 0.3951 | 3.0654  | 3.7959  | 4.6126  |
| log(Travel time)                               | -0.1331 | 0.0611 | -0.2418 | -0.1354 | -0.0010 |
| MODIS net primary production                   | 0.0000  | 0.0000 | -0.0001 | 0.0000  | 0.0001  |
| log(Slope)                                     | 0.3654  | 0.1328 | 0.1148  | 0.3639  | 0.6333  |
| log(Distance to places)                        | -0.2254 | 0.0487 | -0.3206 | -0.2193 | -0.1410 |
| Spatial decay ( $\phi_2$ )*                    | 5.4358  | 1.7235 | 0.7030  | 6.1478  | 6.5876  |
| DTP3 (0-59 months)                             |         |        |         |         |         |
| (Intercept)                                    | 3.0577  | 0.3157 | 2.5272  | 3.0424  | 3.6973  |
| log(Travel time)                               | -0.0660 | 0.0513 | -0.1702 | -0.0653 | 0.0349  |
| MODIS net primary production                   | 0.0000  | 0.0000 | -0.0001 | 0.0000  | 0.0001  |
| log(Slope)                                     | 0.3408  | 0.1205 | 0.1116  | 0.3384  | 0.5859  |
| log(Distance to places)                        | -0.1960 | 0.0398 | -0.2868 | -0.1925 | -0.1214 |
| Spatial decay ( $\phi_3$ )*                    | 4.8940  | 1.5994 | 0.7836  | 5.4269  | 6.5625  |
| Cross covariance parameters $C_w$ for DTP1-3** |         |        |         |         |         |
| $C_w(DTP1)$                                    | 1.6452  | 0.5849 | 0.8525  | 1.5436  | 2.9619  |
| $C_w(DTP1,DTP2)$                               | 1.4912  | 0.4946 | 0.7866  | 1.4064  | 2.7079  |
| $C_w(DTP1,DTP3)$                               | 1.3004  | 0.4405 | 0.7083  | 1.2268  | 2.2490  |
| $C_w(DTP2)$                                    | 1.5909  | 0.5252 | 0.8302  | 1.4983  | 2.8534  |
| $C_w(DTP2,DTP3)$                               | 1.3261  | 0.4302 | 0.7042  | 1.2617  | 2.3556  |
| $C_w(DTP3)$                                    | 1.2416  | 0.4038 | 0.6484  | 1.1972  | 2.1919  |

\*These correspond to effective ranges of 104 km, 274 km, 61 km and 68 km, respectively.

\*\*The estimated values here correspond to correlations of 0.92, 0.91 and 0.94 between DTP1 and 2, DTP1 and 3 and DTP2 and 3, respectively.

Supplementary Table 7. Estimates of the parameters of the fitted models for Mozambique. Reported are the posterior means, standard deviations (SD) and quantiles (2.5%, 50% and 97.5%) of the regression coefficients and the parameters of the spatial random effects.

| Parameter                          | Mean    | SD     | 2.5%    | 50%     | 97.5%   |
|------------------------------------|---------|--------|---------|---------|---------|
| MCV (9-59 months)                  |         |        |         |         |         |
| (Intercept)                        | 1.3506  | 0.9240 | -0.0412 | 1.2366  | 3.0501  |
| log (travel time)                  | -0.1647 | 0.0335 | -0.2272 | -0.1651 | -0.0977 |
| Precipitation                      | 0.0080  | 0.0048 | 0.0007  | 0.0074  | 0.0181  |
| Evapotranspiration                 | 0.0002  | 0.0004 | -0.0005 | 0.0003  | 0.0009  |
| log (MODIS net primary production) | 0.2934  | 0.2083 | -0.0900 | 0.2887  | 0.7253  |
| Partial sill ( $\sigma^2$ )        | 0.9460  | 0.2482 | 0.5531  | 0.9145  | 1.5197  |
| Spatial decay ( $\phi$ )*          | 1.4859  | 0.3482 | 0.8248  | 1.4746  | 2.1948  |
| DTP1 (0-59 months)                 |         |        |         |         |         |

|                                                |         |        |         |         |         |
|------------------------------------------------|---------|--------|---------|---------|---------|
| (Intercept)                                    | 5.4540  | 0.6630 | 4.2534  | 5.3670  | 6.7349  |
| Precipitation                                  | -0.0034 | 0.0043 | -0.0101 | -0.0041 | 0.0071  |
| log(Distance to highways)                      | -0.2591 | 0.0335 | -0.3215 | -0.2604 | -0.1923 |
| log(Slope)                                     | 0.1299  | 0.0899 | -0.0518 | 0.1315  | 0.3066  |
| Evapotranspiration                             | -0.0003 | 0.0003 | -0.0009 | -0.0003 | 0.0001  |
| Spatial decay ( $\phi_1$ )*                    | 0.5759  | 0.0832 | 0.4776  | 0.5563  | 0.7842  |
| DTP2 (0-59 months)                             |         |        |         |         |         |
| (Intercept)                                    | 4.8177  | 0.4541 | 3.9009  | 4.8152  | 5.6238  |
| Precipitation                                  | -0.0065 | 0.0033 | -0.0123 | -0.0068 | 0.0005  |
| log(Distance to highways)                      | -0.2226 | 0.0320 | -0.2847 | -0.2231 | -0.1615 |
| log(Slope)                                     | 0.1812  | 0.0806 | 0.0268  | 0.1779  | 0.3429  |
| Evapotranspiration                             | -0.0015 | 0.0004 | -0.0023 | -0.0015 | -0.0009 |
| Spatial decay ( $\phi_2$ )*                    | 3.0422  | 0.4428 | 1.1976  | 3.1678  | 3.2959  |
| DTP3 (0-59 months)                             |         |        |         |         |         |
| (Intercept)                                    | 4.1460  | 0.4909 | 3.1766  | 4.3126  | 4.7761  |
| Precipitation                                  | -0.0080 | 0.0037 | -0.0134 | -0.0087 | 0.0001  |
| log(Distance to highways)                      | -0.1989 | 0.0247 | -0.2493 | -0.2003 | -0.1509 |
| log(Slope)                                     | 0.1900  | 0.0723 | 0.0497  | 0.1896  | 0.3439  |
| Evapotranspiration                             | -0.0004 | 0.0002 | -0.0009 | -0.0004 | 0.0000  |
| Spatial decay ( $\phi_3$ )*                    | 2.7338  | 0.6623 | 0.5949  | 2.9798  | 3.2852  |
| Cross covariance parameters $C_w$ for DTP1-3** |         |        |         |         |         |
| $C_w(DTP1)$                                    | 1.8554  | 0.4229 | 1.0724  | 1.8301  | 2.7564  |
| $C_w(DTP1,DTP2)$                               | 1.6880  | 0.3736 | 1.0290  | 1.6484  | 2.5068  |
| $C_w(DTP1,DTP3)$                               | 1.4787  | 0.3172 | 0.8994  | 1.4525  | 2.1742  |
| $C_w(DTP2)$                                    | 1.6999  | 0.4083 | 1.0379  | 1.6413  | 2.6282  |
| $C_w(DTP2,DTP3)$                               | 1.4509  | 0.3329 | 0.8905  | 1.4070  | 2.2056  |
| $C_w(DTP3)$                                    | 1.3514  | 0.3138 | 0.8266  | 1.3070  | 2.0310  |

\*These correspond to effective ranges of 224 km, 578 km, 109 km and 122 km, respectively.

\*\*The estimated values here correspond to correlations of 0.95, 0.93 and 0.96 between DTP1 and 2, DTP1 and 3 and DTP2 and 3, respectively.

Supplementary Table 8: Measles Supplementary Immunization Activities (SIAs) occurring within the reference period of the DHS surveys analyzed

| Country    | Most recent DHS date          | Number and extent of coverage of relevant measles SIAs | % reached     |
|------------|-------------------------------|--------------------------------------------------------|---------------|
| DRC        | November 2013 - February 2014 | 25 (2 national and 23 subnational)                     | >= 93%        |
| Ethiopia   | January – June 2016           | 5 (2 national, 2 subnational, 1 unknown )              | >=96%         |
| Mozambique | June – November 2011          | 2 (national)                                           | >=102%        |
| Nigeria    | February – June 2013          | 5 (2 national and 3 subnational)                       | 26% and >=97% |
| Cambodia   | June – December 2014          | 3 (national)                                           | >=100%        |

<sup>a</sup>Source: [http://www.who.int/immunization/monitoring\\_surveillance/data/en/](http://www.who.int/immunization/monitoring_surveillance/data/en/)

Supplementary Table 9: Regional (or administrative level 1) estimates of the coverage of DTP1-3 in children aged under five years and the dropouts between these doses in all five study countries

| <b>Nigeria</b>  |               |                   |                   |                   |                                               |                                |                                |                                |
|-----------------|---------------|-------------------|-------------------|-------------------|-----------------------------------------------|--------------------------------|--------------------------------|--------------------------------|
| Admin unit      | Number of U5s | DTP1 % Vaccinated | DTP2 % Vaccinated | DTP3 % Vaccinated | DTP1 Number unvaccinated (zero-dose children) | Dropouts between DTP1 and DTP2 | Dropouts between DTP2 and DTP3 | Dropouts between DTP1 and DTP3 |
| North Central   | 4,888,918     | 50.64             | 43.09             | 34.42             | 2,413,373                                     | 369,148                        | 423,820                        | 792,968                        |
| North East      | 4,679,566     | 31.57             | 25.41             | 18.75             | 3,202,380                                     | 288,206                        | 311,444                        | 599,650                        |
| North West      | 9,425,566     | 19.35             | 15.57             | 12.06             | 7,601,596                                     | 356,043                        | 330,736                        | 686,779                        |
| South East      | 2,613,667     | 82.53             | 76.96             | 68.38             | 456,605                                       | 145,562                        | 224,161                        | 369,723                        |
| South South     | 3,410,288     | 76.18             | 69.82             | 59.52             | 812,173                                       | 217,165                        | 351,228                        | 568,393                        |
| South West      | 4,798,175     | 71.37             | 61.07             | 50.23             | 1,373,647                                     | 494,306                        | 520,247                        | 1,014,554                      |
| <b>Cambodia</b> |               |                   |                   |                   |                                               |                                |                                |                                |

| Admin unit       | Number of U5s | DTP1 % Vaccinated | DTP2 % Vaccinated | DTP3 % Vaccinated | DTP1 Number unvaccinated (zero-dose children) | Dropouts between DTP1 and DTP2 | Dropouts between DTP2 and DTP3 | Dropouts between DTP1 and DTP3 |
|------------------|---------------|-------------------|-------------------|-------------------|-----------------------------------------------|--------------------------------|--------------------------------|--------------------------------|
| Bântéay Méanchey | 89,608        | 93.24             | 86.94             | 83.32             | 6,058                                         | 5,649                          | 3,244                          | 8,893                          |
| Batdâmbâng       | 135,666       | 91.50             | 84.42             | 80.60             | 11,528                                        | 9,602                          | 5,192                          | 14,794                         |
| Kâmpôt           | 76,202        | 85.76             | 74.55             | 72.03             | 10,849                                        | 8,543                          | 1,923                          | 10,466                         |
| Kâmpóng Cham     | 120,966       | 90.56             | 85.14             | 81.90             | 11,419                                        | 6,561                          | 3,910                          | 10,471                         |
| Kâmpóng Chhnang  | 61,553        | 90.28             | 81.97             | 78.33             | 5,980                                         | 5,116                          | 2,240                          | 7,356                          |
| Kâmpóng Spœ      | 92,090        | 88.92             | 80.80             | 77.32             | 10,201                                        | 7,477                          | 3,210                          | 10,687                         |
| Kâmpóng Thum     | 82,531        | 91.85             | 85.02             | 81.98             | 6,729                                         | 5,636                          | 2,504                          | 8,140                          |
| Kândal           | 166,062       | 92.05             | 86.98             | 83.56             | 13,198                                        | 8,421                          | 5,685                          | 14,106                         |
| Kaôh Kong        | 18,617        | 89.53             | 80.71             | 78.67             | 1,949                                         | 1,642                          | 379                            | 2,021                          |
| Kep              | 4,666         | 83.26             | 70.60             | 67.35             | 781                                           | 591                            | 151                            | 742                            |
| Krâchéh          | 41,927        | 84.20             | 73.73             | 71.24             | 6,626                                         | 4,388                          | 1,046                          | 5,434                          |
| Krong Pailin     | 9,395         | 94.31             | 88.65             | 85.71             | 535                                           | 531                            | 277                            | 808                            |

|                      |               |                   |                   |                   |                          |                                |                                |                                |
|----------------------|---------------|-------------------|-------------------|-------------------|--------------------------|--------------------------------|--------------------------------|--------------------------------|
| Krong Preah Sihanouk | 25,783        | 90.39             | 82.56             | 79.70             | 2,477                    | 2,019                          | 736                            | 2,756                          |
| Môndól Kiri          | 7,962         | 75.63             | 63.08             | 62.28             | 1,940                    | 999                            | 63                             | 1,063                          |
| Otdar Mean Chey      | 22,693        | 89.86             | 82.04             | 79.18             | 2,301                    | 1,774                          | 648                            | 2,423                          |
| Phnom Penh           | 180,972       | 95.43             | 92.59             | 88.52             | 8,277                    | 5,138                          | 7,359                          | 12,497                         |
| Pouthisat            | 52,048        | 92.81             | 85.86             | 82.90             | 3,744                    | 3,618                          | 1,539                          | 5,157                          |
| Preah Vihéar         | 22,496        | 85.78             | 75.52             | 73.13             | 3,199                    | 2,308                          | 537                            | 2,845                          |
| Prey Vêng            | 124,085       | 90.68             | 84.64             | 81.61             | 11,566                   | 7,488                          | 3,760                          | 11,248                         |
| Rôtânôkiri           | 19,823        | 75.13             | 60.90             | 60.04             | 4,931                    | 2,821                          | 170                            | 2,991                          |
| Siemréab             | 120,560       | 91.00             | 83.94             | 80.00             | 10,846                   | 8,522                          | 4,748                          | 13,270                         |
| Stoeng Trêng         | 14,623        | 86.40             | 74.98             | 72.39             | 1,988                    | 1,670                          | 379                            | 2,049                          |
| Svay Rieng           | 63,360        | 90.07             | 84.30             | 81.68             | 6,292                    | 3,656                          | 1,660                          | 5,316                          |
| Takêv                | 110,867       | 90.18             | 82.20             | 79.32             | 10,888                   | 8,844                          | 3,191                          | 12,035                         |
| Tbong Khmum          | 99,130        | 86.33             | 77.59             | 74.60             | 13,555                   | 8,656                          | 2,969                          | 11,625                         |
| <b>Mozambique</b>    |               |                   |                   |                   |                          |                                |                                |                                |
| Admin unit           | Number of U5s | DTP1 % Vaccinated | DTP2 % Vaccinated | DTP3 % Vaccinated | DTP1 Number unvaccinated | Dropouts between DTP1 and DTP2 | Dropouts between DTP2 and DTP3 | Dropouts between DTP1 and DTP3 |



|              |               |                   |                   |                   |                                               |                                |                                |                                |
|--------------|---------------|-------------------|-------------------|-------------------|-----------------------------------------------|--------------------------------|--------------------------------|--------------------------------|
|              |               |                   |                   |                   | (zero-dose children)                          |                                |                                |                                |
| Cabo Delgado | 335,332       | 85.72             | 77.72             | 67.09             | 47,891                                        | 26,829                         | 35,631                         | 62,460                         |
| Gaza         | 207,288       | 92.00             | 87.00             | 79.09             | 16,582                                        | 10,360                         | 16,405                         | 26,766                         |
| Inhambane    | 268,323       | 91.46             | 86.01             | 76.91             | 22,920                                        | 14,608                         | 24,423                         | 39,031                         |
| Manica       | 325,458       | 87.59             | 80.72             | 71.68             | 40,374                                        | 22,366                         | 29,445                         | 51,811                         |
| Maputo City  | 451,606       | 93.10             | 89.09             | 83.89             | 31,175                                        | 18,090                         | 23,482                         | 41,572                         |
| Maputo       | 108,880       | 95.04             | 91.95             | 86.91             | 5,405                                         | 3,357                          | 5,488                          | 8,845                          |
| Nampula      | 860,995       | 82.75             | 74.01             | 63.14             | 148,494                                       | 75,263                         | 93,573                         | 168,836                        |
| Niassa       | 276,241       | 84.70             | 77.96             | 68.06             | 42,271                                        | 18,624                         | 27,329                         | 45,953                         |
| Sofala       | 356,528       | 91.24             | 85.03             | 76.08             | 31,236                                        | 22,141                         | 31,905                         | 54,046                         |
| Tete         | 418,915       | 81.45             | 74.31             | 64.98             | 77,692                                        | 29,915                         | 39,111                         | 69,026                         |
| Zambezia     | 835,385       | 73.38             | 63.49             | 52.08             | 222,415                                       | 82,546                         | 95,358                         | 177,904                        |
| <b>DRC</b>   |               |                   |                   |                   |                                               |                                |                                |                                |
| Admin unit   | Number of U5s | DTP1 % Vaccinated | DTP2 % Vaccinated | DTP3 % Vaccinated | DTP1 Number unvaccinated (zero-dose children) | Dropouts between DTP1 and DTP2 | Dropouts between DTP2 and DTP3 | Dropouts between DTP1 and DTP3 |

|                  |               |                   |                   |                   |                                               |                                |                                |                                |
|------------------|---------------|-------------------|-------------------|-------------------|-----------------------------------------------|--------------------------------|--------------------------------|--------------------------------|
| Équateur         | 1,479,489     | 57.85             | 45.93             | 31.34             | 623,600                                       | 176,395                        | 215,754                        | 392,149                        |
| Bandundu         | 1,527,121     | 75.57             | 67.54             | 51.76             | 373,026                                       | 122,655                        | 241,008                        | 363,663                        |
| Bas-Congo        | 554,838       | 86.21             | 82.28             | 72.95             | 76,520                                        | 21,784                         | 51,793                         | 73,577                         |
| Kasaï-Occidental | 1,200,500     | 75.21             | 64.44             | 45.83             | 297,591                                       | 129,251                        | 223,467                        | 352,717                        |
| Kasaï-Oriental   | 1,446,431     | 57.66             | 46.12             | 31.11             | 612,376                                       | 166,972                        | 217,104                        | 384,076                        |
| Katanga          | 1,848,649     | 54.98             | 47.50             | 36.07             | 832,242                                       | 138,290                        | 211,327                        | 349,617                        |
| Kinshasa City    | 991,289       | 80.57             | 74.91             | 63.80             | 192,635                                       | 56,031                         | 110,189                        | 166,220                        |
| Kivu             | 2,111,920     | 71.89             | 64.55             | 50.19             | 593,576                                       | 155,066                        | 303,375                        | 458,441                        |
| Orientale        | 2,562,693     | 63.19             | 52.18             | 36.24             | 943,350                                       | 282,201                        | 408,504                        | 690,705                        |
| <b>Ethiopia</b>  |               |                   |                   |                   |                                               |                                |                                |                                |
| Admin unit       | Number of U5s | DTP1 % Vaccinated | DTP2 % Vaccinated | DTP3 % Vaccinated | DTP1 Number unvaccinated (zero-dose children) | Dropouts between DTP1 and DTP2 | Dropouts between DTP2 and DTP3 | Dropouts between DTP1 and DTP3 |

|                                             |           |       |       |       |           |         |         |           |
|---------------------------------------------|-----------|-------|-------|-------|-----------|---------|---------|-----------|
| Addis Ababa                                 | 596,231   | 90.16 | 85.24 | 78.63 | 58,641    | 29,380  | 39,368  | 68,748    |
| Afar                                        | 293,550   | 29.70 | 19.65 | 14.38 | 206,352   | 29,508  | 15,471  | 44,979    |
| Amhara                                      | 3,912,029 | 69.73 | 58.29 | 46.27 | 1,184,157 | 447,446 | 470,410 | 917,856   |
| Benshangul-Gumaz                            | 158,668   | 72.54 | 65.10 | 54.74 | 43,576    | 11,802  | 16,430  | 28,232    |
| Dire Dawa                                   | 80,912    | 76.41 | 64.99 | 53.89 | 19,088    | 9,239   | 8,977   | 18,217    |
| Gambela Peoples                             | 67,853    | 53.23 | 41.99 | 29.67 | 31,735    | 7,624   | 8,362   | 15,986    |
| Harari People                               | 35,912    | 60.30 | 46.02 | 35.59 | 14,255    | 5,130   | 3,745   | 8,875     |
| Oromia                                      | 5,364,868 | 57.73 | 45.67 | 35.44 | 2,267,627 | 646,912 | 549,158 | 1,196,071 |
| Somali                                      | 823,850   | 24.75 | 14.43 | 9.73  | 619,924   | 85,050  | 38,698  | 123,748   |
| Southern Nations, Nationalities and Peoples | 2,941,194 | 66.19 | 55.18 | 43.14 | 994,376   | 323,886 | 354,101 | 677,987   |
| Tigray                                      | 902,113   | 80.27 | 74.23 | 66.69 | 177,992   | 54,470  | 68,008  | 122,479   |

Supplementary Table 10: Percentages of surveyed children aged  $\leq 1$  month and  $\leq 3$  months in the study countries

| Country    | Percentage of under 5s aged $\leq 1$ month | Percentage of under 5s aged $\leq 3$ months |
|------------|--------------------------------------------|---------------------------------------------|
| Ethiopia   | 4.9                                        | 10.9                                        |
| Mozambique | 3.1                                        | 6.7                                         |
| Cambodia   | 2.9                                        | 6.4                                         |
| Nigeria    | 6.4                                        | 10.2                                        |
| DRC        | 3.0                                        | 7.2                                         |

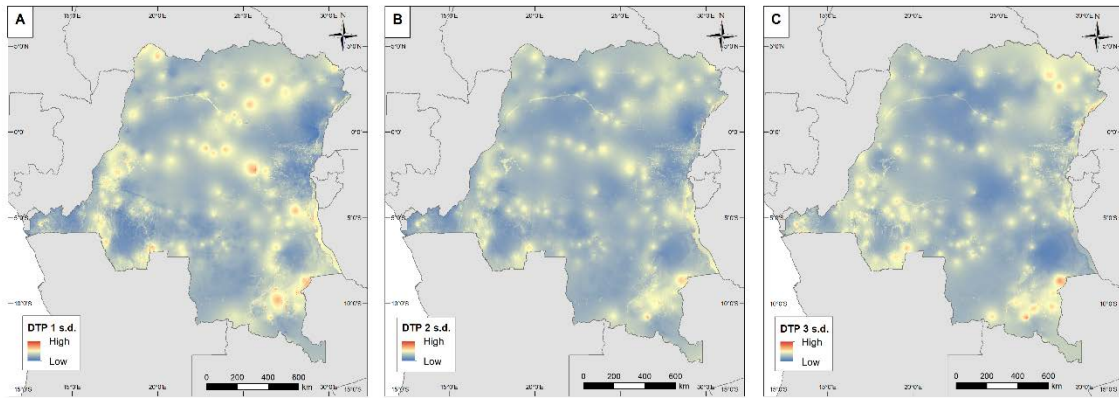

Supplementary Figure 1: (A-C) Uncertainty (standard deviation) maps for DTP doses 1, 2 and 3 vaccination coverage in children under 5 in DRC.

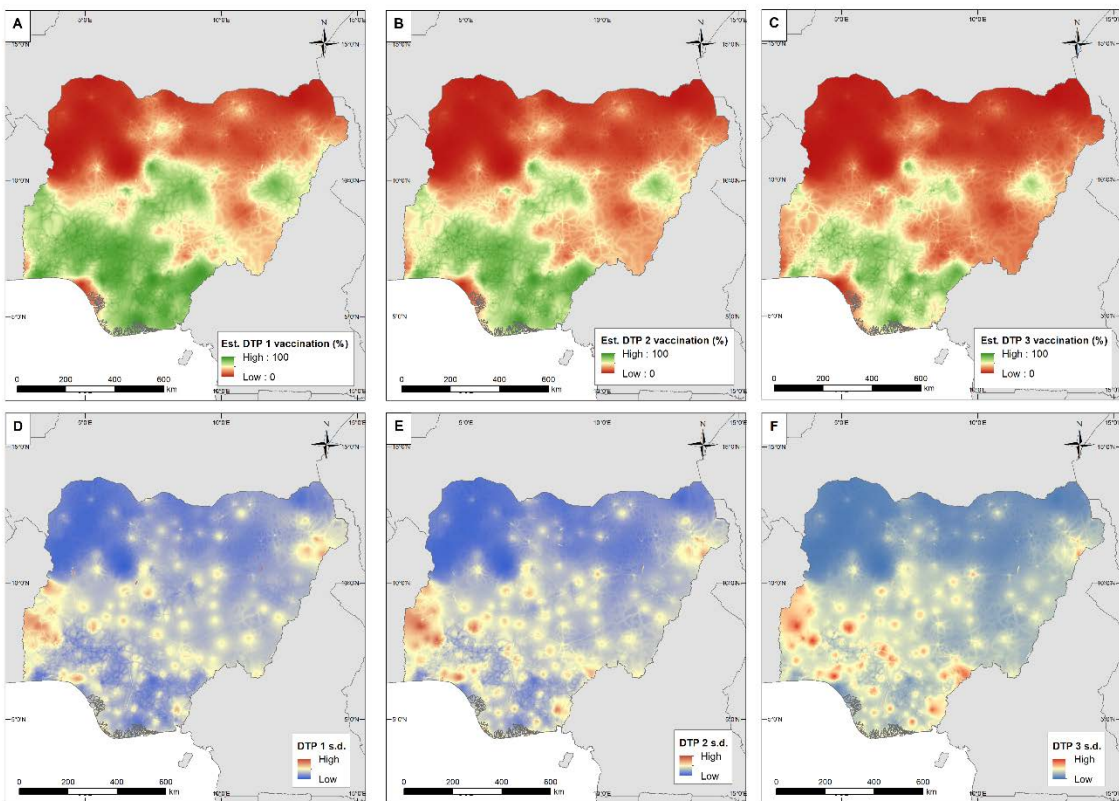

Supplementary Figure 2: (A - C) Estimated DTP doses 1, 2 and 3 vaccination coverage in children under 5 years old at 1x1 km resolution for Nigeria in 2013. (D - F) Associated uncertainty maps measured as standard deviations.

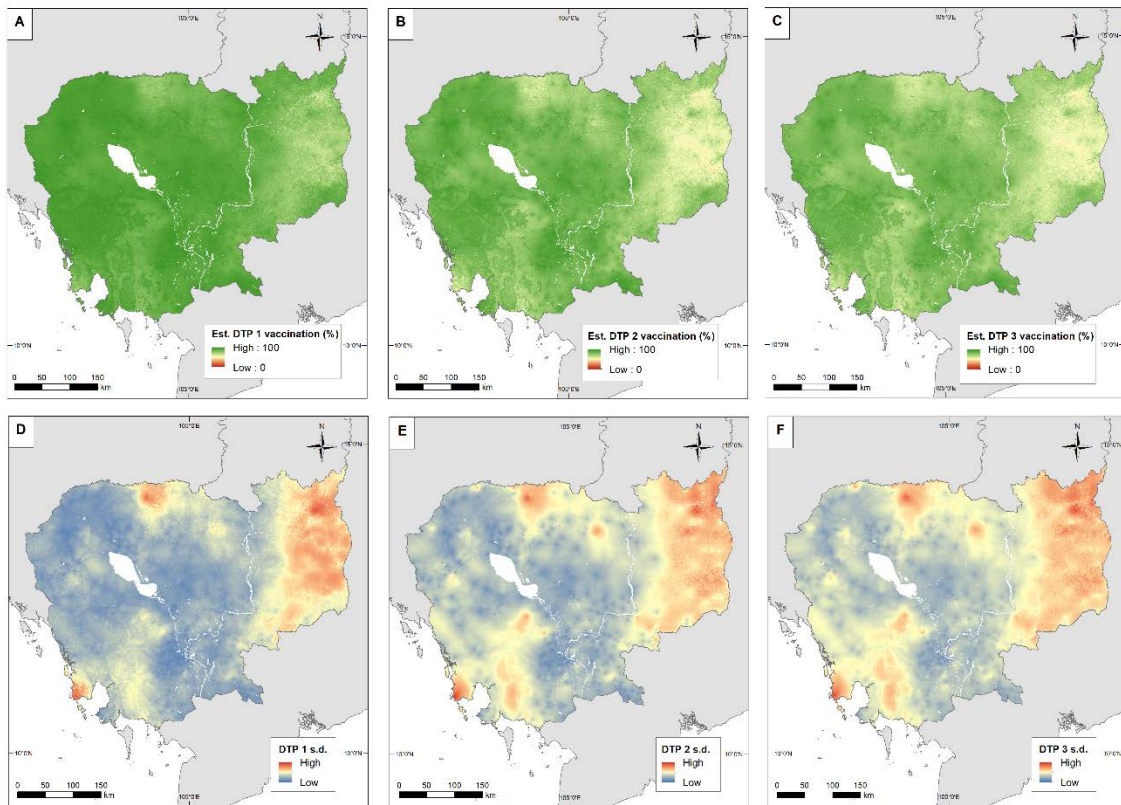

Supplementary Figure 3: (A - C) Estimated DTP doses 1, 2 and 3 vaccination coverage in children under 5 years old at 1x1 km resolution for Cambodia in 2014. (D - F) Associated uncertainty maps measured as standard deviations.

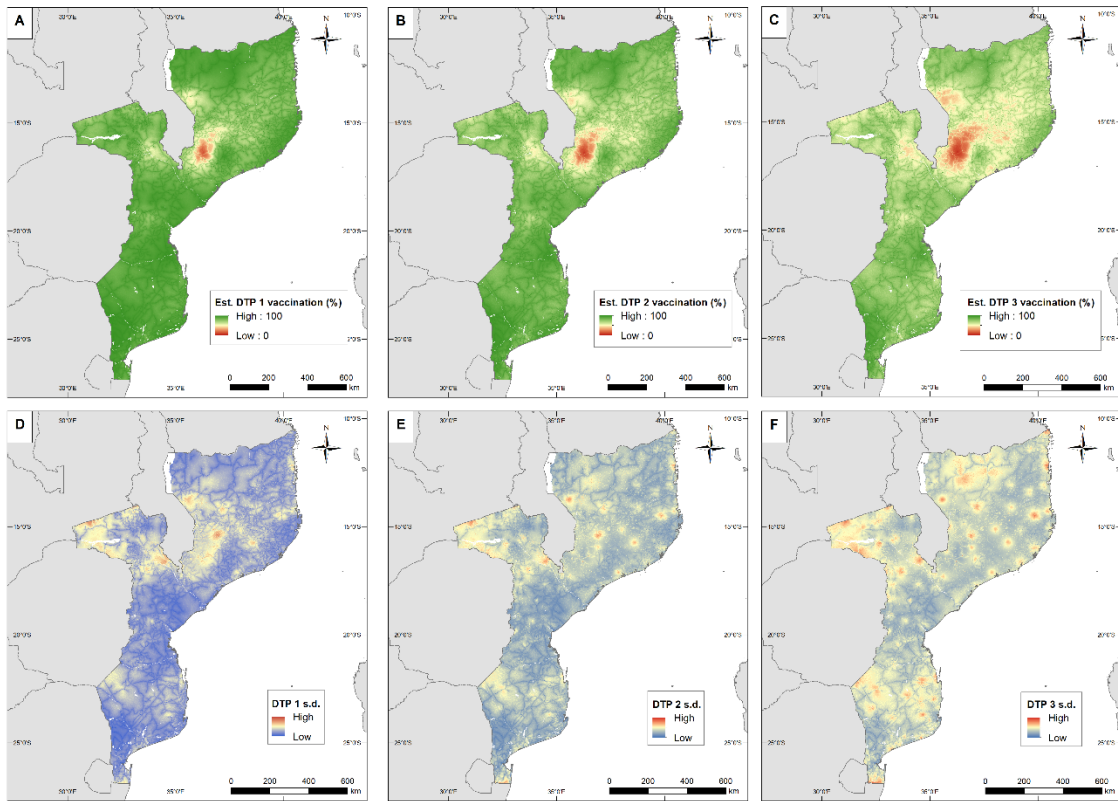

Supplementary Figure 4: (A - C) Estimated DTP doses 1, 2 and 3 vaccination coverage in children under 5 years old at 1x1 km resolution for Mozambique in 2011. (D - F) Associated uncertainty maps measured as standard deviations.

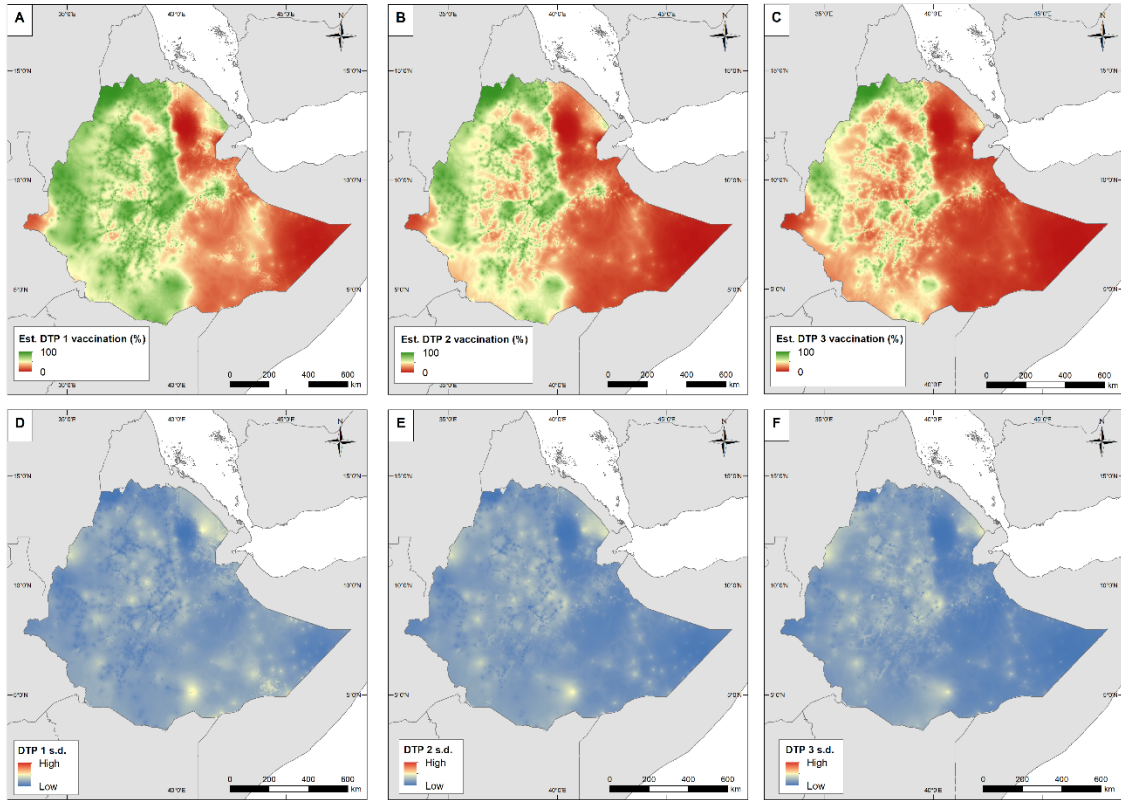

Supplementary Figure 5: (A - C) Estimated DTP doses 1, 2 and 3 vaccination coverage in children under 5 years old at 1x1 km resolution for Ethiopia in 2016. (D - F) Associated uncertainty maps measured as standard deviations.



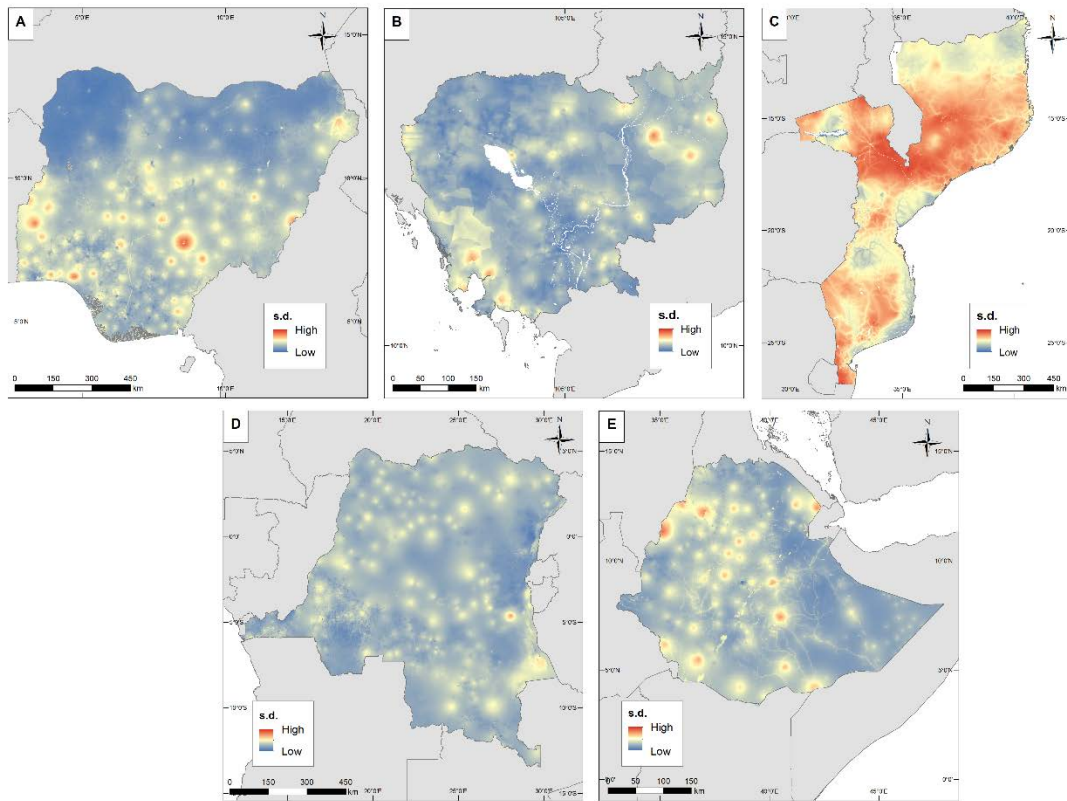

Supplementary Figure 6: Uncertainty (standard deviation) maps for measles vaccination coverage in children aged 9-59 months in (A) Nigeria, (B) Cambodia, (C) Mozambique, (D) DRC and (E) Ethiopia.

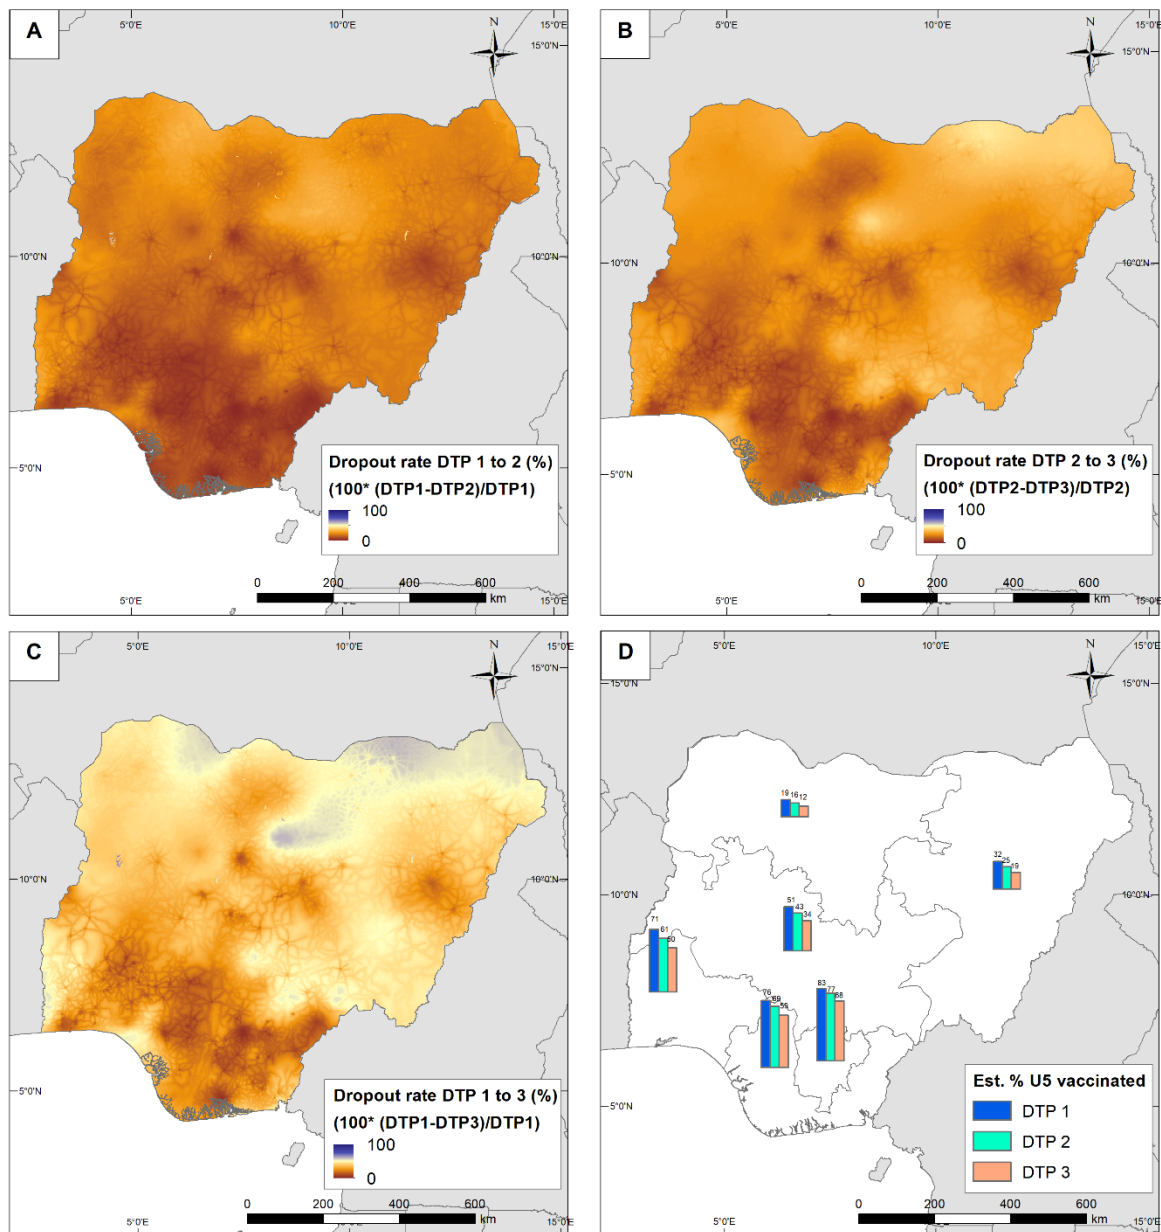

Supplementary Figure 7: (A – C) Estimated dropout rates between DTP vaccination doses 1 to 3 in children under 5 years old at 1x1 km resolution for Nigeria in 2013. The estimated percentage of children receiving each dose in each administrative unit is shown in panel (D).

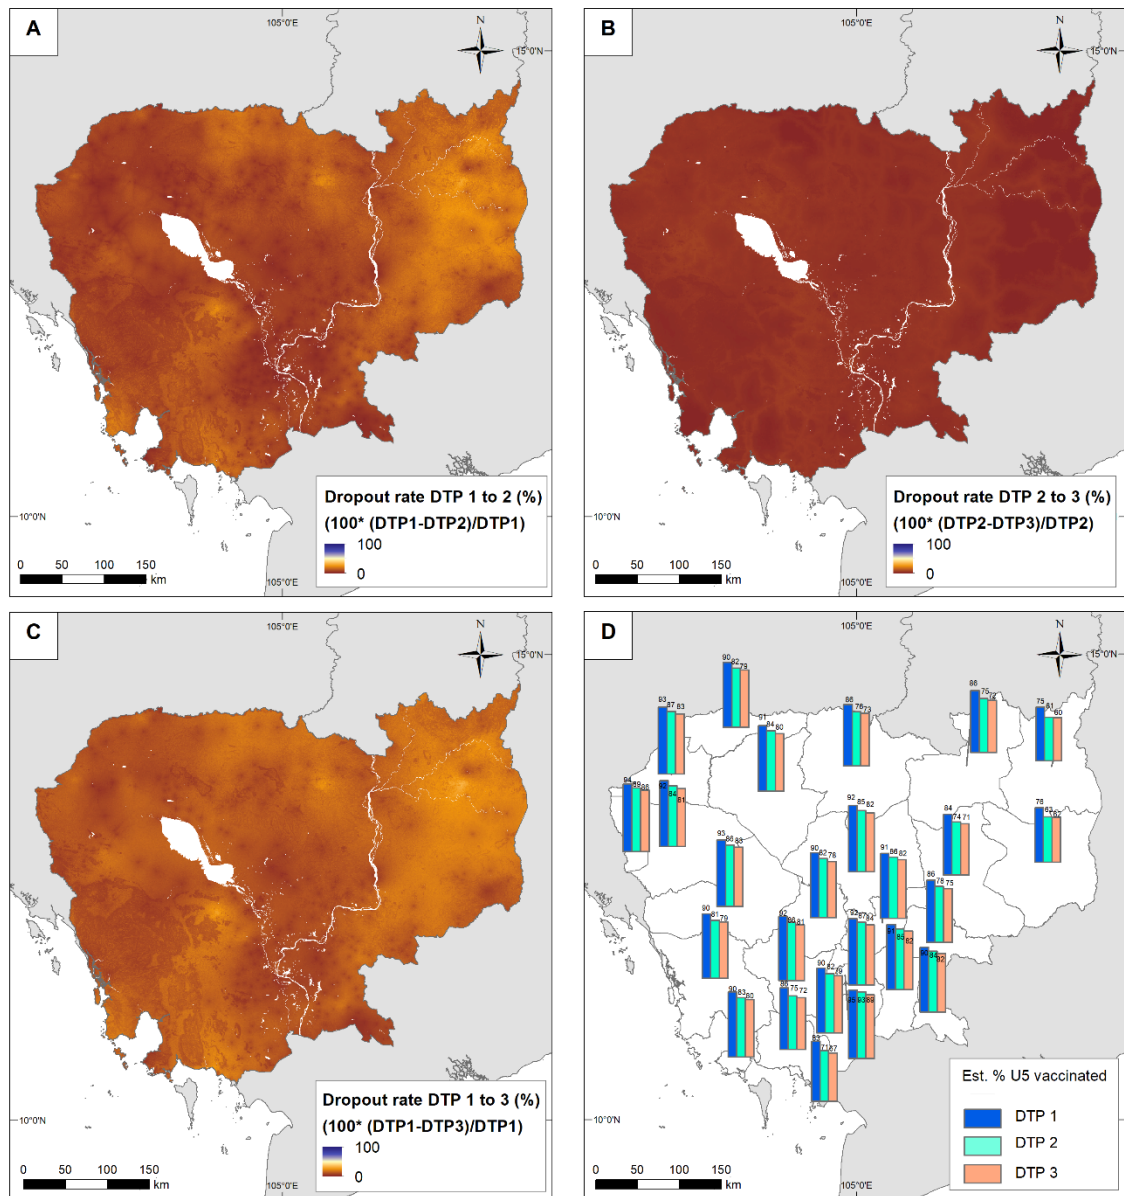

Supplementary Figure 8: (A - C) Estimated dropout rates between DTP vaccination doses 1 to 3 in children under 5 years old at 1x1 km resolution for Cambodia in 2014. The estimated percentage of children receiving each dose in each administrative unit is shown in panel (D).

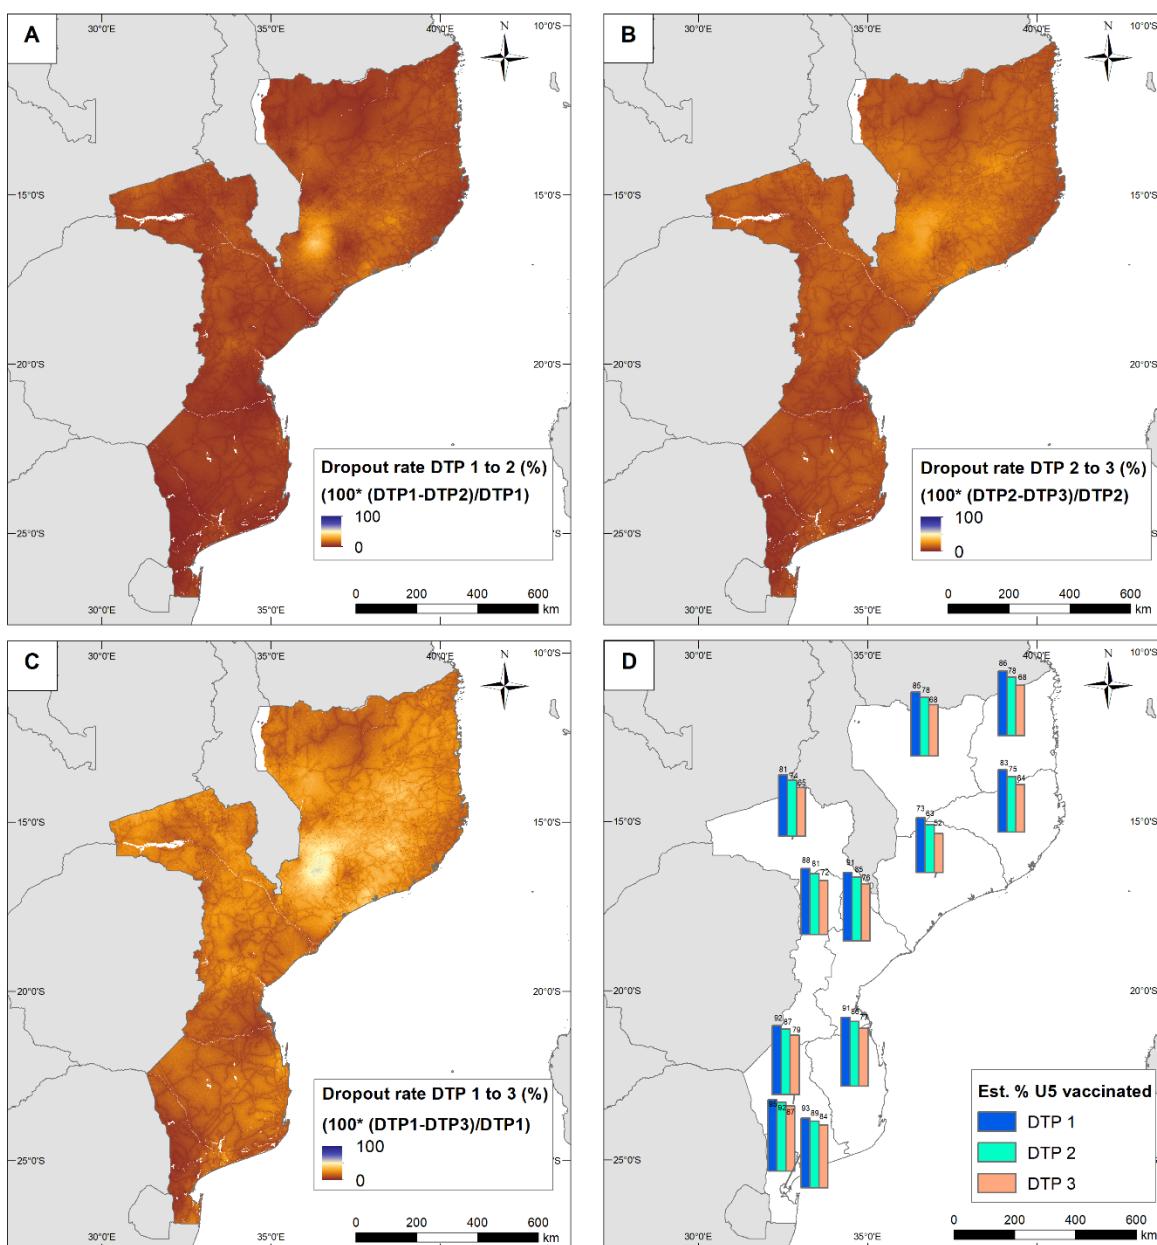

Supplementary Figure 9: (A - C) Estimated dropout rates between DTP vaccination doses 1 to 3 in children under 5 years old at 1x1 km resolution for Mozambique in 2011. The estimated percentage of children receiving each dose in each administrative unit is shown in panel (D).

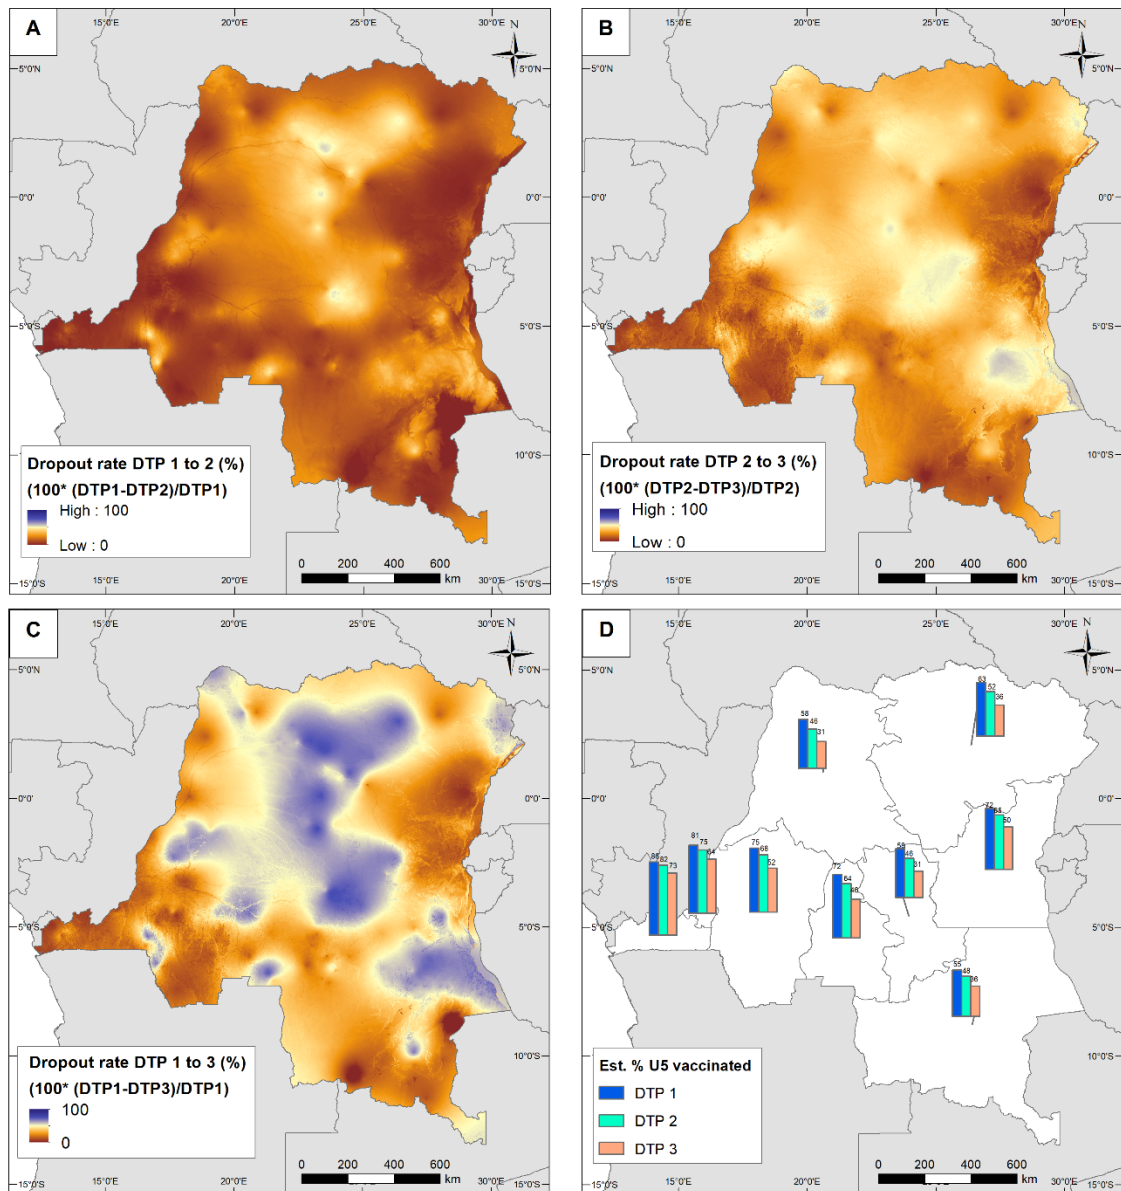

Supplementary Figure 10: (A - C) Estimated dropout rates between DTP vaccination doses 1 to 3 in children under 5 years old at 1x1 km resolution for DRC in 2013-14. The estimated percentage of children receiving each dose in each administrative unit is shown in panel (D).

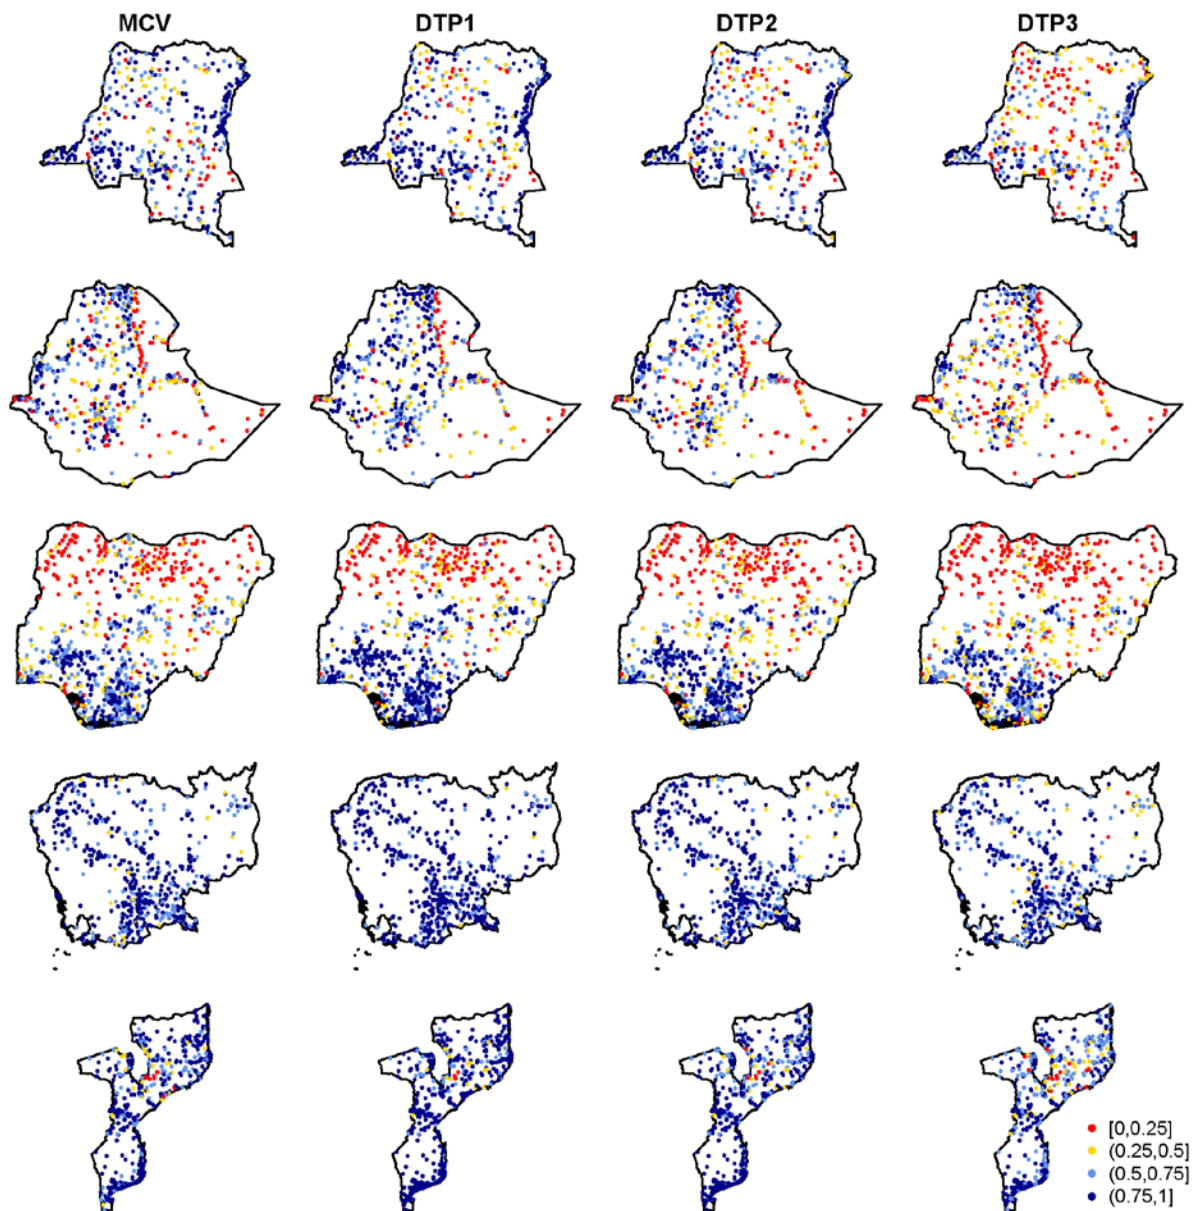

Supplementary Figure 11: DHS survey cluster locations and observed vaccination coverage for MCV (9-59 months) and DTP1-3 (0-59 months) for (top-bottom) DRC 2014, Ethiopia 2016, Nigeria 2013, Cambodia 2014, and Mozambique 2011.

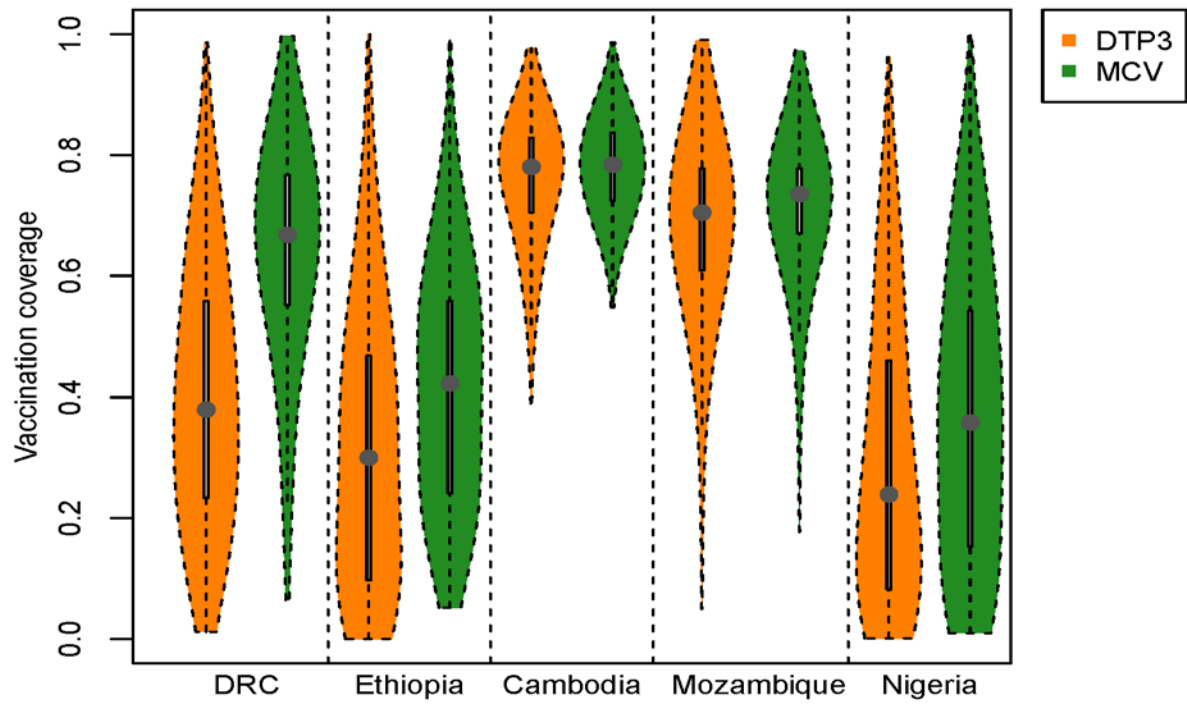

Supplementary Figure 12: Plots of the distributions of DTP3 and MCV coverage in all five study countries. The grey dots in the violin plots represent the medians of the distributions while the thick grey bars show their interquartile range.

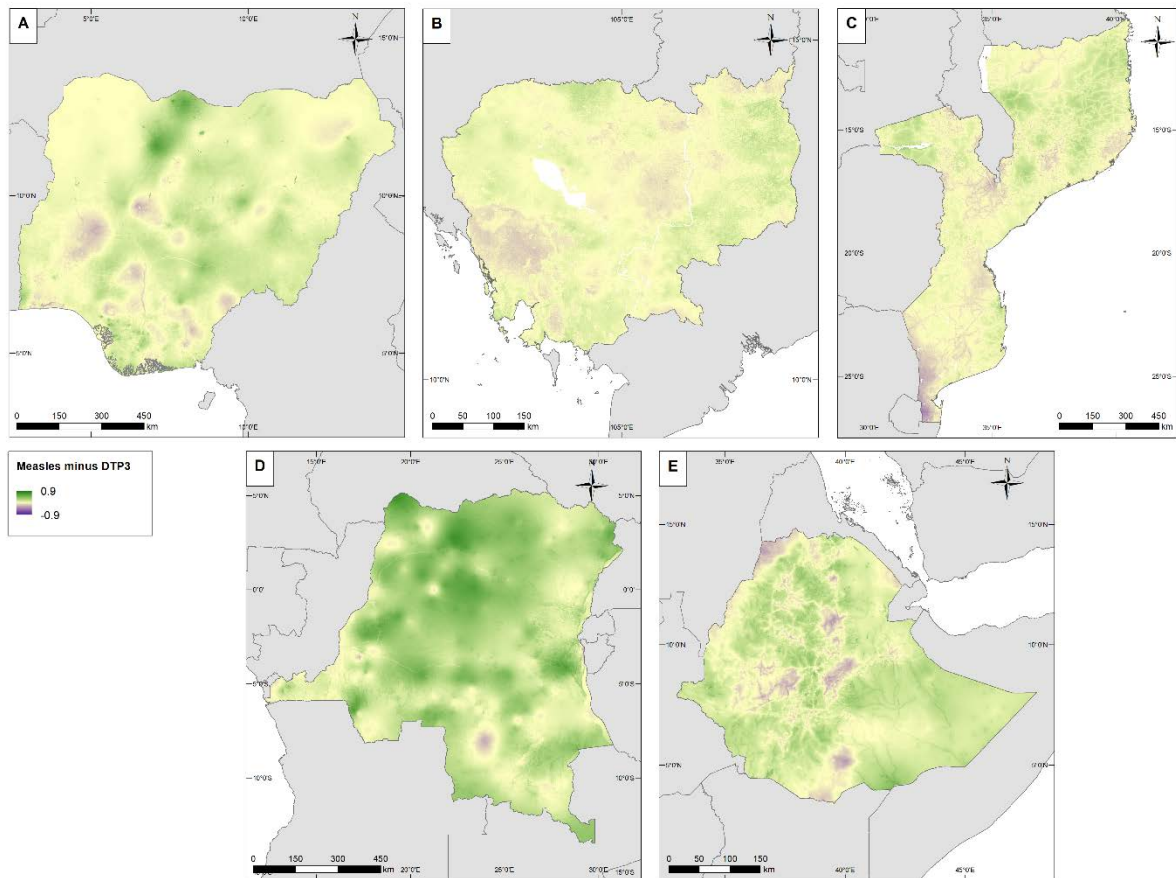

Supplementary Figure 13: Differences between predicted measles and DTP3 coverage at 1x1 km resolution for (A - E) Nigeria, Cambodia, Mozambique, DRC and Ethiopia.



## Supplementary References

1. Finley AO, Banerjee S, Carlin BP. spBayes: An R Package for Univariate and Multivariate Hierarchical Point-referenced Spatial Models. *Journal of statistical software* **19**, 1-24 (2007).
2. Finley AO, Banerjee S, Ek AR, McRoberts RE. Bayesian multivariate process modeling for prediction of forest attributes. *Journal of Agricultural, Biological, and Environmental Statistics* **13**, 60 (2008).
3. Royle JA, Nychka D. An algorithm for the construction of spatial coverage designs with implementation in SPLUS. *Computers & Geosciences* **24**, 479-488 (1998).
4. Utazi CE, *et al.* High resolution age-structured mapping of childhood vaccination coverage in low and middle income countries. *Vaccine* **36**, 1583-1591 (2018).
5. Geweke J. Evaluating the accuracy of sampling-based approaches to calculating posterior moments. In: *Bayesian Statistics 4* (eds. Bernardo JM, Berger JO, Dawid AP, Smith AFM). Clarendon Press (1992).
